# Supplementary material for: Assessing Knowledge and Attitude of Healthcare Professionals on Biosimilars: A National Survey for Pharmacists and Physicians in Taiwan
Source: MDPI journal article supplement (doi:10.3390/healthcare9111600), 2021-11-21
Supplement: s1 [file s1]

## Supplementary Material

**Table S1.** The association between attitude statements and demographic characteristics.

| Statements     | Q10. I possess a good understanding of biosimilar products. |              |               |         | Q11. Generally, I feel comfortable prescribing biosimilars to patients because I am confident about their safety and efficacy. |              |               |         | Q12. The nonproprietary name of biosimilars should be distinguishable from the reference product. |             |               |         | Q13. If necessary, I accept the switch to a biosimilar product for patients receiving treatment of its reference product. |              |               |         | Q14. I would only prescribe a biosimilar product to those who have never received treatment with its reference drug (i.e., biologic-naïve). |              |              |         | Q15. I am familiar with the regulations of the Taiwan Food and Drug Administration (TFDA) on biosimilars. |              |               |         | Q16. The non-proprietary name of biosimilar drugs should not be distinguishable from the reference product (respondent reliability). |             |              |         |
|----------------|-------------------------------------------------------------|--------------|---------------|---------|--------------------------------------------------------------------------------------------------------------------------------|--------------|---------------|---------|---------------------------------------------------------------------------------------------------|-------------|---------------|---------|---------------------------------------------------------------------------------------------------------------------------|--------------|---------------|---------|---------------------------------------------------------------------------------------------------------------------------------------------|--------------|--------------|---------|-----------------------------------------------------------------------------------------------------------|--------------|---------------|---------|--------------------------------------------------------------------------------------------------------------------------------------|-------------|--------------|---------|
|                | D                                                           | N            | A             | p-value | D                                                                                                                              | N            | A             | p-value | D                                                                                                 | N           | A             | p-value | D                                                                                                                         | N            | A             | p-value | D                                                                                                                                           | N            | A            | p-value | D                                                                                                         | N            | A             | p-value | D                                                                                                                                    | N           | A            | p-value |
|                | n (%)                                                       |              |               |         | n (%)                                                                                                                          |              |               |         | n (%)                                                                                             |             |               |         | n (%)                                                                                                                     |              |               |         | n (%)                                                                                                                                       |              |              |         | n (%)                                                                                                     |              |               |         |                                                                                                                                      |             |              |         |
| Specialty      | 0.001*                                                      |              |               |         | 0.10                                                                                                                           |              |               |         | 0.20                                                                                              |             |               |         | 0.02*                                                                                                                     |              |               |         | 0.21                                                                                                                                        |              |              |         | 0.91                                                                                                      |              |               |         | 0.002*                                                                                                                               |             |              |         |
| Pharmacist     | 38<br>(23.2)                                                | 39<br>(23.8) | 87<br>(53.0)  |         | 37<br>(22.6)                                                                                                                   | 44<br>(26.8) | 83<br>(50.6)  |         | 16<br>(9.8)                                                                                       | 8<br>(4.9)  | 139<br>(85.3) |         | 39<br>(23.9)                                                                                                              | 38<br>(23.3) | 86<br>(52.8)  |         | 58<br>(35.4)                                                                                                                                | 50<br>(30.5) | 56<br>(34.1) |         | 54<br>(32.9)                                                                                              | 43<br>(26.2) | 67<br>(40.9)  |         | 132<br>(80.5)                                                                                                                        | 11<br>(6.7) | 21<br>(12.8) |         |
| Oncology       | 15<br>(12.2)                                                | 28<br>(22.8) | 80<br>(65.0)  |         | 35<br>(28.7)                                                                                                                   | 22<br>(18.0) | 65<br>(53.3)  |         | 7<br>(5.7)                                                                                        | 7<br>(5.7)  | 109<br>(88.6) |         | 42<br>(34.1)                                                                                                              | 23<br>(18.7) | 58<br>(47.2)  |         | 50<br>(40.7)                                                                                                                                | 38<br>(30.9) | 35<br>(28.5) |         | 42<br>(34.1)                                                                                              | 29<br>(23.6) | 52<br>(42.3)  |         | 108<br>(87.8)                                                                                                                        | 11<br>(8.9) | 4<br>(3.3)   |         |
| Rheumatologist | 8<br>(7.4)                                                  | 19<br>(17.6) | 81<br>(75.0)  |         | 38<br>(35.2)                                                                                                                   | 19<br>(17.6) | 51<br>(47.2)  |         | 3<br>(2.8)                                                                                        | 8<br>(7.4)  | 97<br>(89.8)  |         | 40<br>(37.4)                                                                                                              | 30<br>(28.0) | 37<br>(34.6)  |         | 40<br>(37.0)                                                                                                                                | 23<br>(21.3) | 45<br>(41.7) |         | 32<br>(29.6)                                                                                              | 31<br>(28.7) | 45<br>(41.7)  |         | 99<br>(91.7)                                                                                                                         | 7<br>(6.5)  | 2<br>(1.9)   |         |
| Gender         | 0.007*                                                      |              |               |         | 0.37                                                                                                                           |              |               |         | 0.96                                                                                              |             |               |         | 0.97                                                                                                                      |              |               |         | 0.15                                                                                                                                        |              |              |         | 0.55                                                                                                      |              |               |         | 0.42                                                                                                                                 |             |              |         |
| Male           | 31<br>(12.6)                                                | 45<br>(18.2) | 171<br>(69.2) |         | 67<br>(27.2)                                                                                                                   | 47<br>(19.1) | 132<br>(53.7) |         | 16<br>(6.5)                                                                                       | 14<br>(5.7) | 216<br>(87.8) |         | 77<br>(31.3)                                                                                                              | 56<br>(22.8) | 113<br>(45.9) |         | 96<br>(38.9)                                                                                                                                | 60<br>(24.3) | 91<br>(36.8) |         | 77<br>(32.2)                                                                                              | 62<br>(25.1) | 108<br>(43.7) |         | 211<br>(85.4)                                                                                                                        | 21<br>(8.5) | 15<br>(6.1)  |         |
| Female         | 28<br>(19.9)                                                | 38<br>(27.0) | 75<br>(53.2)  |         | 41<br>(29.1)                                                                                                                   | 34<br>(24.1) | 66<br>(46.8)  |         | 9<br>(6.4)                                                                                        | 9<br>(6.4)  | 123<br>(87.2) |         | 43<br>(30.7)                                                                                                              | 31<br>(22.1) | 66<br>(47.1)  |         | 50<br>(35.5)                                                                                                                                | 47<br>(33.3) | 44<br>(31.2) |         | 50<br>(35.5)                                                                                              | 37<br>(26.2) | 54<br>(38.3)  |         | 121<br>(85.7)                                                                                                                        | 8<br>(5.7)  | 12<br>(8.5)  |         |
| Age group      | 0.96                                                        |              |               |         | 0.77                                                                                                                           |              |               |         | 0.97                                                                                              |             |               |         | 0.66                                                                                                                      |              |               |         | 0.57                                                                                                                                        |              |              |         | 0.19                                                                                                      |              |               |         | 0.01*                                                                                                                                |             |              |         |
| 20-39          | 22<br>(24.4)                                                | 19<br>(21.1) | 49<br>(54.4)  |         | 24<br>(26.7)                                                                                                                   | 25<br>(27.8) | 41<br>(45.6)  |         | 5<br>(5.6)                                                                                        | 6<br>(6.7)  | 79<br>(87.8)  |         | 25<br>(27.8)                                                                                                              | 19<br>(21.1) | 46<br>(51.1)  |         | 35<br>(38.9)                                                                                                                                | 29<br>(32.2) | 26<br>(28.9) |         | 36<br>(40.0)                                                                                              | 26<br>(28.9) | 28<br>(31.1)  |         | 77<br>(85.6)                                                                                                                         | 5<br>(5.6)  | 8<br>(8.9)   |         |
| 40-49          | 22<br>(12.6)                                                | 42<br>(24.0) | 111<br>(63.4) |         | 51<br>(29.1)                                                                                                                   | 35<br>(20.0) | 89<br>(50.9)  |         | 12<br>(6.9)                                                                                       | 8<br>(4.6)  | 154<br>(88.5) |         | 54<br>(31.2)                                                                                                              | 45<br>(26.0) | 74<br>(42.8)  |         | 58<br>(33.1)                                                                                                                                | 50<br>(28.6) | 67<br>(38.3) |         | 52<br>(29.7)                                                                                              | 47<br>(26.9) | 76<br>(43.4)  |         | 155<br>(88.6)                                                                                                                        | 8<br>(4.6)  | 12<br>(6.9)  |         |
| 50-59          | 14<br>(15.1)                                                | 15<br>(16.1) | 64<br>(68.8)  |         | 25<br>(27.2)                                                                                                                   | 19<br>(20.7) | 48<br>(52.2)  |         | 7<br>(7.5)                                                                                        | 6<br>(6.5)  | 80<br>(86.0)  |         | 28<br>(30.1)                                                                                                              | 18<br>(19.4) | 47<br>(50.5)  |         | 39<br>(41.9)                                                                                                                                | 22<br>(23.7) | 32<br>(34.4) |         | 26<br>(28.0)                                                                                              | 25<br>(26.9) | 42<br>(45.2)  |         | 78<br>(83.9)                                                                                                                         | 8<br>(8.6)  | 7<br>(7.5)   |         |
| 60+            | 3<br>(8.1)                                                  | 10<br>(27.0) | 24<br>(64.9)  |         | 10<br>(27.0)                                                                                                                   | 6<br>(16.2)  | 21<br>(56.8)  |         | 2<br>(5.4)                                                                                        | 3<br>(8.1)  | 32<br>(86.5)  |         | 14<br>(37.8)                                                                                                              | 9<br>(24.3)  | 14<br>(37.8)  |         | 16<br>(43.2)                                                                                                                                | 10<br>(27.0) | 11<br>(29.7) |         | 14<br>(37.8)                                                                                              | 5<br>(13.5)  | 18<br>(4836)  |         | 29<br>(78.4)                                                                                                                         | 8<br>(21.6) | 0<br>(0)     |         |
| Hospital types | 0.04*                                                       |              |               |         | 0.66                                                                                                                           |              |               |         | 0.007*                                                                                            |             |               |         | 0.43                                                                                                                      |              |               |         | 0.57                                                                                                                                        |              |              |         | 0.66                                                                                                      |              |               |         | 0.008*                                                                                                                               |             |              |         |
| Medical        | 17<br>(11.8)                                                | 25<br>(17.4) | 102<br>(70.8) |         | 43<br>(30.1)                                                                                                                   | 32<br>(22.4) | 68<br>(47.6)  |         | 4<br>(2.8)                                                                                        | 4<br>(2.8)  | 136<br>(94.4) |         | 44<br>(30.8)                                                                                                              | 38<br>(26.6) | 61<br>(42.7)  |         | 51<br>(35.4)                                                                                                                                | 45<br>(31.3) | 48<br>(33.3) |         | 45<br>(31.3)                                                                                              | 35<br>(24.3) | 64<br>(44.4)  |         | 133<br>(92.4)                                                                                                                        | 8<br>(5.6)  | 3<br>(2.1)   |         |
| Regional       | 44<br>(17.5)                                                | 61<br>(24.3) | 146<br>(58.2) |         | 67<br>(26.7)                                                                                                                   | 53<br>(21.1) | 131<br>(52.2) |         | 22<br>(8.8)                                                                                       | 19<br>(7.6) | 209<br>(83.6) |         | 77<br>(30.8)                                                                                                              | 53<br>(21.2) | 120<br>(48.0) |         | 97<br>(38.6)                                                                                                                                | 66<br>(26.3) | 88<br>(35.1) |         | 83<br>(33.1)                                                                                              | 68<br>(27.1) | 100<br>(39.8) |         | 206<br>(82.1)                                                                                                                        | 21<br>(8.4) | 24<br>(9.6)  |         |
| Regions        | 0.34                                                        |              |               |         | 0.65                                                                                                                           |              |               |         |                                                                                                   |             |               |         |                                                                                                                           |              |               |         |                                                                                                                                             |              |              |         |                                                                                                           |              |               |         |                                                                                                                                      |             |              |         |
| North          | 32<br>(17.4)                                                | 41<br>(22.3) | 111<br>(60.3) |         | 55<br>(29.9)                                                                                                                   | 37<br>(20.1) | 92<br>(50.0)  |         | 13<br>(7.1)                                                                                       | 8<br>(4.3)  | 163<br>(88.6) | 0.13    | 60<br>(32.8)                                                                                                              | 40<br>(21.9) | 83<br>(45.4)  | 0.51    | 75<br>(40.8)                                                                                                                                | 53<br>(28.8) | 56<br>(30.4) | 0.05    | 61<br>(33.2)                                                                                              | 51<br>(27.7) | 72<br>(39.1)  | 0.20    | 157<br>(85.3)                                                                                                                        | 16<br>(8.7) | 11<br>(6.0)  | 0.70    |
| Central        | 17<br>(17.9)                                                | 20<br>(21.1) | 58<br>(61.1)  |         | 21<br>(22.1)                                                                                                                   | 23<br>(24.2) | 51<br>(53.7)  |         | 2<br>(2.1)                                                                                        | 8<br>(8.5)  | 84<br>(89.4)  |         | 23<br>(24.2)                                                                                                              | 24<br>(25.3) | 48<br>(50.5)  |         | 33<br>(34.7)                                                                                                                                | 32<br>(33.7) | 30<br>(31.6) |         | 31<br>(32.6)                                                                                              | 17<br>(17.9) | 47<br>(49.5)  |         | 84<br>(88.4)                                                                                                                         | 6<br>(6.3)  | 5<br>(5.3)   |         |
| South          | 9<br>(9.2)                                                  | 20<br>(20.4) | 69<br>(70.4)  |         | 28<br>(28.9)                                                                                                                   | 23<br>(23.7) | 46<br>(47.4)  |         | 10<br>(10.2)                                                                                      | 7<br>(7.1)  | 81<br>(82.7)  |         | 31<br>(32.0)                                                                                                              | 26<br>(26.8) | 40<br>(41.2)  |         | 29<br>(29.6)                                                                                                                                | 23<br>(23.5) | 46<br>(46.9) |         | 28<br>(28.6)                                                                                              | 31<br>(31.6) | 39<br>(39.8)  |         | 83<br>(84.7)                                                                                                                         | 6<br>(6.1)  | 9<br>(9.2)   |         |

Note: The attitude question statements were represented with a 5-point Likert data, D: Strongly disagree and disagree, N: Neutral, A: Strongly agree and agree; Gender [n = 388, P (160), O (121), R (107)], excluded the “prefer not to say” category; Regions [n = 377, P (156), O (116), R (105)], excluded the “Eastern region” category. \* $P < 0.05$ .
